# Supplementary material for: A Web-Based Psychoeducational Intervention for Adolescent Depression: Design and Development of MoodHwb
Source: JMIR Ment Health. 2018 Feb 15;5(1):e13. doi: 10.2196/mental.8894 (PMC5832901; doi:10.2196/mental.8894)
Supplement: Multimedia Appendix 3 [file mental_v5i1e13_app3.pdf]

**Table: How the interview and group findings influenced the development of the program**

| Findings from interviews and groups                                  | Examples of how themes were addressed in the web-based program                                                                                                                                                                                                                                       | Possible underlying psychological and behaviour change theory and approach |
|----------------------------------------------------------------------|------------------------------------------------------------------------------------------------------------------------------------------------------------------------------------------------------------------------------------------------------------------------------------------------------|----------------------------------------------------------------------------|
| <b>Key theme 1: Needs and aims</b>                                   |                                                                                                                                                                                                                                                                                                      |                                                                            |
| Accessible for a diverse range of users                              | Introduce 3 broad user pathways: i) young person, ii) parent, carer, other, iii) browse option;<br>Develop design elements (eg, character design) which are not specific eg, to gender, age, culture;<br>Implement different levels of information and personal stories from a range of perspectives |                                                                            |
| Increase awareness, knowledge, understanding;<br>Reduce stigma       | Communicate information on mood and depression at an accessible, youth-friendly level;<br>Explain that low mood and depression is common in young people, and it can affect everyone                                                                                                                 | IMBT                                                                       |
| Embrace how young people use digital technologies                    | Develop the program so that it can be used on a range of platforms, especially portable devices;<br>Develop an accompanying app                                                                                                                                                                      | SDT, SRT                                                                   |
| Promote self-management or autonomy                                  | Give opportunities for the user to relate the content to their experiences eg, through interactive features;<br>Develop a Self help section                                                                                                                                                          | SDT, SRT                                                                   |
| Young people find it difficult to talk to adults                     | Develop the program so that it can be used alone or with someone the user trusts;<br>Provide a diverse list of resources for the user and highlight a variety of different sources of help                                                                                                           | IMBT                                                                       |
| Help for parents, carers and professionals working with young people | Develop user pathways specifically designed for families, carers, friends and professionals;<br>Develop a separate section for them as well                                                                                                                                                          | SCT, IMBT, Resilience theory, Family systems theory                        |

---

## Key theme 2: Design issues

---

|                                                                                            |                                                                                                                                                                                                                                                                                                                                                                                                 |                                                |
|--------------------------------------------------------------------------------------------|-------------------------------------------------------------------------------------------------------------------------------------------------------------------------------------------------------------------------------------------------------------------------------------------------------------------------------------------------------------------------------------------------|------------------------------------------------|
| Harnessing multimedia to:<br>i) <i>engage</i> the user, ii) <i>communicate</i> information | Use a range of imagery and multimedia formats such as animation and audio                                                                                                                                                                                                                                                                                                                       |                                                |
| Clear structure and navigation, multiplatform use                                          | Develop clear user pathways from the welcome screen, use drop-down and side menus;<br>Keep the structure of the modules consistent;<br>Use color to easily distinguish between sections and aid navigation                                                                                                                                                                                      |                                                |
| Language                                                                                   | Create a bilingual program (English and Welsh);<br>Ensure the general tone and wording are age-appropriate;<br>Avoid use of jargon and 'unhelpful' words and phrases                                                                                                                                                                                                                            |                                                |
| Characters                                                                                 | Develop engaging characters with some ambiguity, so that they are not specific to gender, age, culture;<br>Ensure that facial expressions are used sparingly in the illustrations and animations                                                                                                                                                                                                |                                                |
| Imagery, metaphors, moodboards, color                                                      | Use images and visual metaphors to help illustrate aspects of mood and depression throughout;<br>Take a graphic illustrative approach throughout, rather than photography and live-action video;<br>Ensure the colors are bright and uplifting, and appropriate for the general design, color contrast etc.                                                                                     | CB theory                                      |
| Gamification                                                                               | Introduce a quiz at the start and the end of each section                                                                                                                                                                                                                                                                                                                                       |                                                |
| Personalising the space, monitoring tool, interactive elements                             | Ask the user to answer questions at the start of the program (and throughout) to:<br>i) help monitor mood and other issues, ii) highlight relevant subsections within the program;<br>Encourage self-monitoring, in a helpful manner;<br>Develop a 'My profile' component, including answers to questions, allow user to select profile picture;<br>Develop a 'Stuff I like' component and app; | SRT, SDT,<br>CB theory, Behavioural activation |

|                                                        |                                                                                                                                                                                                                                                                                                                                                                                 |                                                                                      |
|--------------------------------------------------------|---------------------------------------------------------------------------------------------------------------------------------------------------------------------------------------------------------------------------------------------------------------------------------------------------------------------------------------------------------------------------------|--------------------------------------------------------------------------------------|
|                                                        | Develop a 'My goals' component and app                                                                                                                                                                                                                                                                                                                                          |                                                                                      |
| Security and confidentiality<br>(Forums, social media) | Ensure the user's account is password-protected;<br>Encrypt account data on servers;<br>Do not link to forums or social media, or allow users to share information with one another                                                                                                                                                                                             |                                                                                      |
| <b>Key theme 3: Content issues</b>                     |                                                                                                                                                                                                                                                                                                                                                                                 |                                                                                      |
| General approach<br><i>Levels of information</i>       | Communicate general information to young people and others regarding aspects of mood and depression;<br>Introduce levels of information to the sections:<br>i) animations (and intro and summary subsections) for key messages,<br>ii) subsections to include text and image,<br>iii) further details via collapsible blocks, feature blocks,<br>iv) links to further resources | IMBT                                                                                 |
| <i>Positive and validating approach</i>                | Emphasis on strengths and positives throughout, not only possible difficulties;<br>Subsections in 'Self help' section eg, 'Believe in yourself'                                                                                                                                                                                                                                 | SDT, SCT, Resilience theory,<br>Positive psychology                                  |
| Mood, depression, its symptoms and effects             | Communicate information on: what are mood and depression in young people;<br>Take a bio-psycho-social and cognitive behavioural approach–identify links between thoughts, feelings, actions;<br>Include personal experiences – diversity in case studies, recovery oriented                                                                                                     | IMBT,<br>CB theory                                                                   |
| Possible reasons for depression                        | Communicate information on: possible reasons and triggers, how to appreciate strengths, focus on modifiable factors;<br>Include a diverse range of possible reasons for depression, taking a bio-psycho-social approach                                                                                                                                                         | IMBT,<br>CB theory                                                                   |
| Prevention and self-management                         | Communicate information on: range of self help strategies;<br>For self-efficacy – subsection on 'Believe in yourself';<br>Include some information on sleep, exercise, diet, drugs and alcohol                                                                                                                                                                                  | SDT, SCT, IMBT,<br>CB theory, Resilience theory,<br>IP theory, Family systems theory |

|                                                                                                                                                                                                                                           |                                                                                                                                                                                                                                      |                                                                      |
|-------------------------------------------------------------------------------------------------------------------------------------------------------------------------------------------------------------------------------------------|--------------------------------------------------------------------------------------------------------------------------------------------------------------------------------------------------------------------------------------|----------------------------------------------------------------------|
| Where to get help                                                                                                                                                                                                                         | Communicate general information on: range of sources of help (eg, in an emergency);<br>Include information on what to expect from services;<br>Links to helpful resources;<br>Information on psychological treatments and medication | SDT, IMBT,<br>IP theory,<br>Family systems theory                    |
| Other health issues                                                                                                                                                                                                                       | Build a separate section for other health issues eg, anxiety, self-harm;<br>Communicate general information for each and provide links to further resources                                                                          | SDT, SRT, IMBT,<br>CB theory                                         |
| Parents, carers, friends, professionals                                                                                                                                                                                                   | Develop a section specifically for parents, carers and friends;<br>Link this section to the adolescent sections for further information;<br>Develop personal stories from perspective of others                                      | SCT, IMBT, Resilience theory,<br>IP theory,<br>Family systems theory |
| <b>Key theme 4: Integration and context</b>                                                                                                                                                                                               |                                                                                                                                                                                                                                      |                                                                      |
| Use of the program with others                                                                                                                                                                                                            | Develop the program so that it could be used with someone else                                                                                                                                                                       | SCT, IMBT                                                            |
| School and education services                                                                                                                                                                                                             | Develop the program so that it could be used independently by pupils, or with school counsellors or in lessons                                                                                                                       | SCT, IMBT                                                            |
| Health and other services                                                                                                                                                                                                                 | Develop the program so that it could be used with health professionals                                                                                                                                                               | SCT, IMBT                                                            |
| Name, branding                                                                                                                                                                                                                            | Use a name and approach that resonates with young people, with no negative or stigmatising associations                                                                                                                              |                                                                      |
| Abbreviations: Cognitive behavioural theory (CB theory); Interpersonal theory (IP theory); Information, motivation, behaviour theory (IMBT); Self regulation theory (SRT); Self determination theory (SDT); Social cognitive theory (SCT) |                                                                                                                                                                                                                                      |                                                                      |
